# Supplementary material for: Functional Characterization of the Steroid Reductase Genes GmDET2a and GmDET2b from Glycine max
Source: MDPI journal article supplement (doi:10.3390/ijms19030726), 2018-03-03
Supplement: s1 [file s1]

Table S1 List of primers in this study

|                |                                  |                                                                     |
|----------------|----------------------------------|---------------------------------------------------------------------|
| GmDET2a.nF     | TCACATATTTTCGTCCATTACCA          | Nest-PCR to amplify <i>Gm DET2a</i>                                 |
| GmDET2a.nR     | TGTCCTTTGAAGTAGCAGTGTTA          | Nest-PCR to amplify <i>Gm DET2a</i>                                 |
| GmDET2b.nF     | TCCATCTTCTCTAATCTCCGTC           | Nest-PCR to amplify <i>Gm DET2b</i>                                 |
| GmDET2b.nR     | CCTTTGAAGTAGCTAGTCAGCT           | Nest-PCR to amplify <i>Gm DET2b</i>                                 |
| GmDET2a/2b.oxF | AaggtaccATGATCCCAGAACACTACTCC    | Over-expression                                                     |
| GmDET2a/2b.oxR | AagtcgacTCAATACAAGTAAGGAATAACAGC | Over-expression                                                     |
| AtCPD.qF       | TTGCTCAACTCAAGGAAGAG             | qRT-PCR                                                             |
| AtCPD.qR       | TGATGTTAGCCACTCGTAGC             | qRT-PCR                                                             |
| AtDWF4.qF      | CATAAAGCTCTTCAGTCACGA            | qRT-PCR                                                             |
| AtDWF4.qR      | CGTCTGTTCTTTGTTTCCTAA            | qRT-PCR                                                             |
| AtBR6ox1.qF    | TCCCGTATCGGAGTCTTTGGT            | qRT-PCR                                                             |
| AtBR6ox1.qR    | TGGCCAATCTTTGGCGAA               | qRT-PCR                                                             |
| AtBR6ox2.qF    | CAATAGTCTCAATGGACGCAGAGT         | qRT-PCR                                                             |
| AtBR6ox2.qR    | AACCGCAGCTATGTTGCATG             | qRT-PCR                                                             |
| GmDET2a.qF     | ACCGTAGGTGGTATTTGGAG             | qRT-PCR                                                             |
| GmDET2a.qR     | TCCTTGACCTCACATTAAGCA            | qRT-PCR                                                             |
| GmDET2b.qF     | GGTGGTATTTGGAGAAGTTTGG           | qRT-PCR                                                             |
| GmDET2b.qR     | CCCACATTCCCAAATACAATCC           | qRT-PCR                                                             |
| AtEF1- α 4.qF  | CTGGAGGTTTTGAGGCTGGTAT           | qRT-PCR                                                             |
| AtEF1- α 4.qR  | CCAAGGGTGAAAGCAAGAAGA            | qRT-PCR                                                             |
| GmEF-1 α .qF   | CTGGAGGTTTTGAGGCTGGTAT           | qRT-PCR                                                             |
| GmEF-1 α .qR   | CCAAGGGTGAAAGCAAGAAGA            | qRT-PCR                                                             |
| GmDET2a/b.qF   | AATGTATGGGCTGATAGGGT             | qRT-PCR to identify over-expression lines of GmDET2aOX or GmDET2bOX |
|                | AGGTGGTATTTGGAGAAGTTTG           |                                                                     |
| GmDET2a/b.qR   |                                  | qRT-PCR to identify over-expression lines of GmDET2aOX or GmDET2bOX |
