# Supplementary figures and images for: Functional Characterization of the Steroid Reductase Genes GmDET2a and GmDET2b from Glycine max
Source: MDPI journal article supplement (doi:10.3390/ijms19030726), 2018-03-03

**A**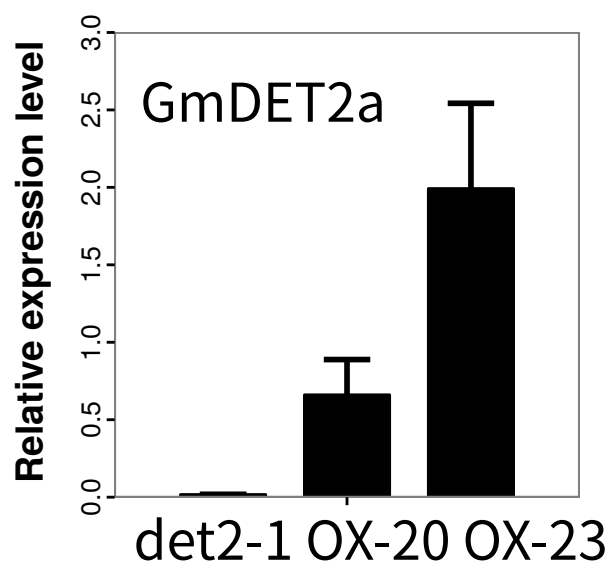**B**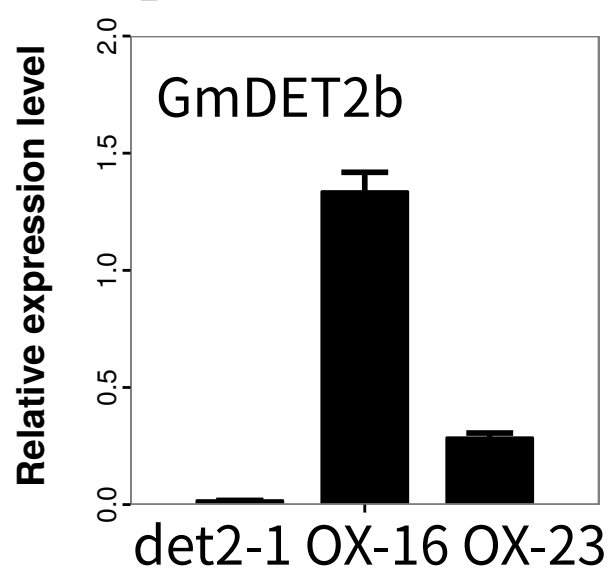

Supplement: s1 [file s1]
